# Supplementary material
Source: Springer Nature journal article supplement (https://www.springermedizin.de/resource/supplementary/12890_2014_503_MOESM2_ESM.pdf/9505640)

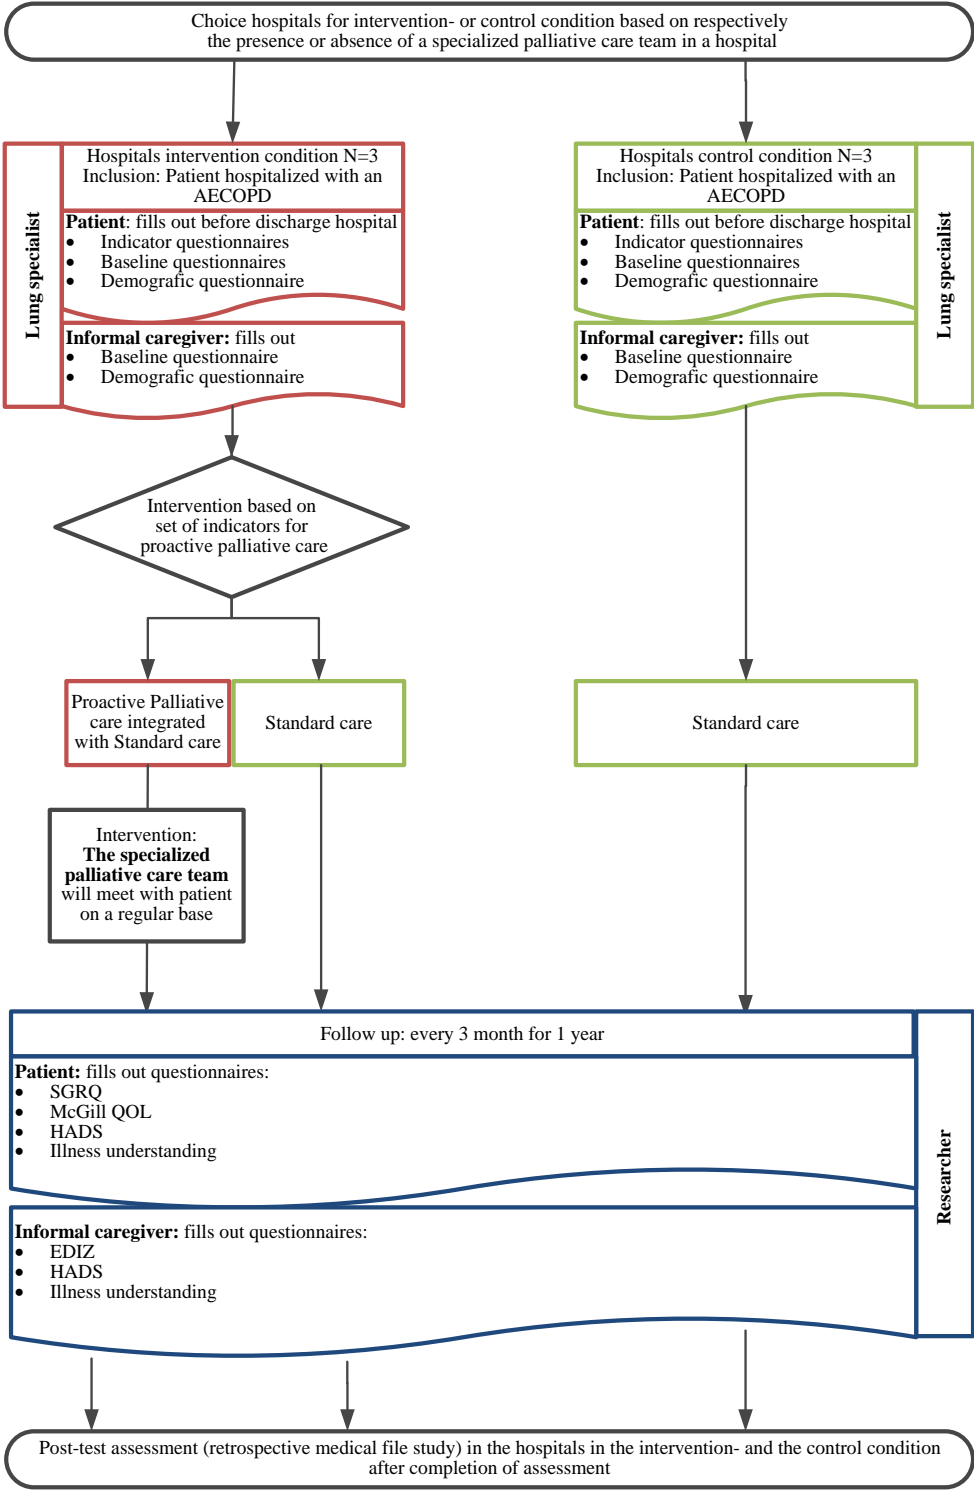

Supplement: MOESM2 [file 9505640]
